# Supplementary material
Source: PubMed Central journal article supplement (PMC7195257)
Supplement: NIHMS1570878-supplement-1.pdf [file NIHMS1570878-supplement-1.pdf]

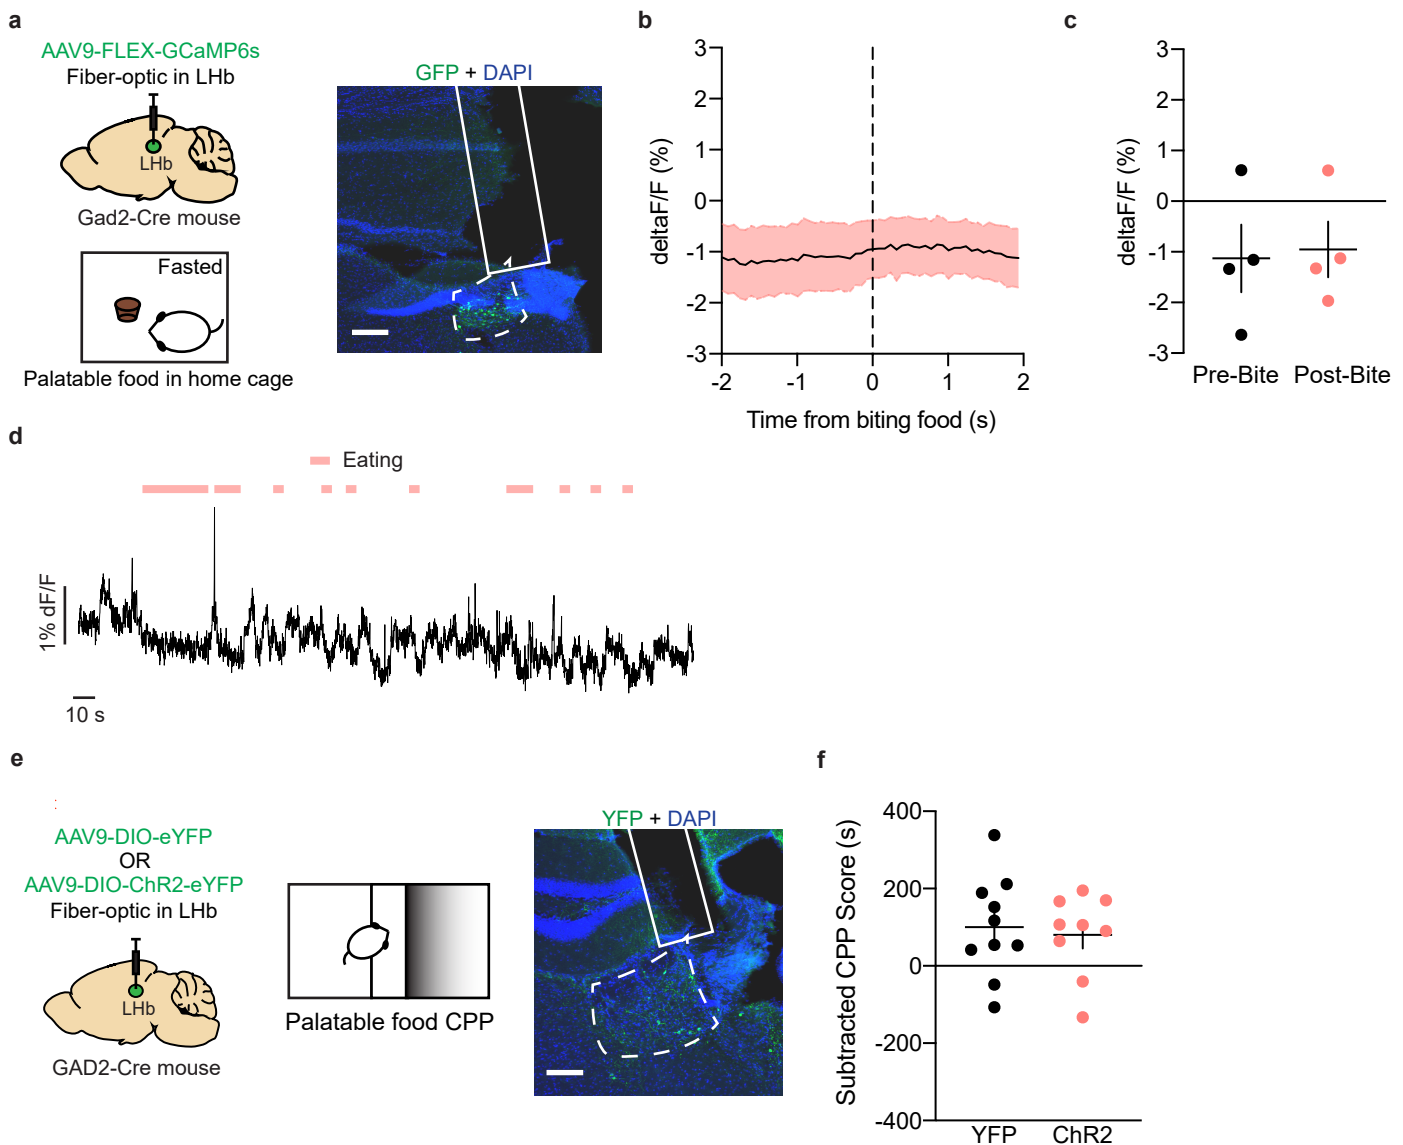

**Supplementary Figure 1: Lhb GAD2 neurons are not involved in palatable food reward.** **a**, Surgical manipulations and representative viral infection image for Lhb GAD2 neuron palatable food reward photometry experiments, scale bar = 400  $\mu$ m. **b**, Peri-event plot of Lhb GAD2 activity 2s before and after biting palatable food in a fasted state in the home cage. Black line denotes mean signal for all animals while pink shading denotes SEM,  $n=4$  biologically independent mice. **c**, Average Lhb GAD2 neuron activity was not different before and after the bite (two-tailed paired t-test,  $n=4$  biologically independent mice,  $t(3)=1.077$ ,  $p=0.3603$ ). **d**, Representative trace of Lhb GAD2 neuron activity during exposure to palatable food in the home cage. **e**, Surgical manipulations and representative viral infection image for Lhb GAD2 palatable food CPP optogenetics (ChR2) experiments, scale bar = 200  $\mu$ m. **f**, ChR2-mediated optogenetic stimulation of Lhb GAD2 neurons during the palatable food CPP test did not alter the amount of time spent in the palatable food-paired context (two-tailed student's t-test,  $n=10$  biologically independent YFP mice and  $n=9$  biologically independent ChR2 mice,  $t(17)=0.3572$ ,  $p=0.7253$ ). All data are expressed as mean + SEM.

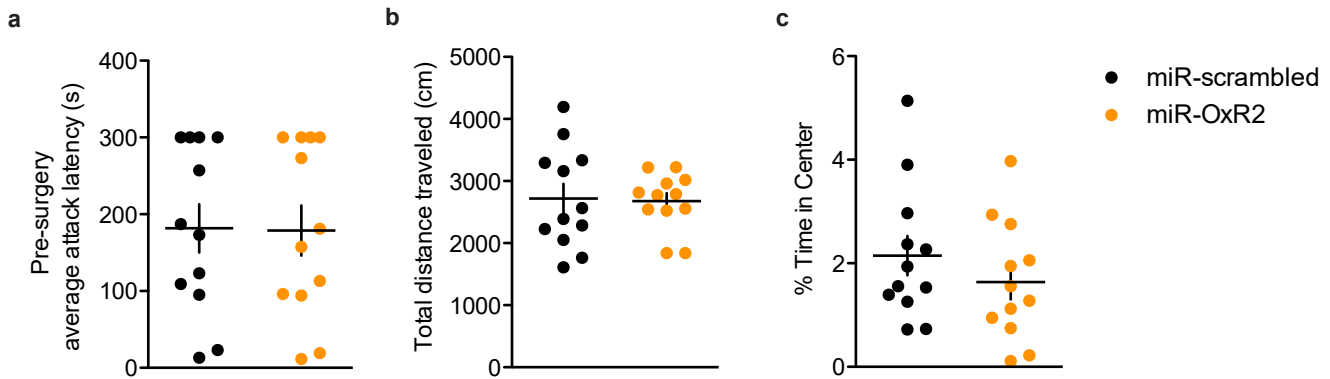

**Supplementary Figure 2: Pre-surgery attack latency, locomotor behavior, and anxiety-related behavior for GAD2-cre mice treated with miR-scrambled or miR-OxR2 viruses.** **a**, miR-scrambled and miR-OxR2 mice did not display differences in attack latency before surgery (two-tailed student's t-test,  $n=12$  biologically independent mice per group,  $t(22)=0.0693$ ,  $p=0.946$ ). **b**, Following surgery, miR-OxR2 mice did not display differences in total distance traveled in the open field compared to miR-scrambled mice (two-tailed student's t-test,  $n=12$  biologically independent mice per group,  $t(22)=0.1639$ ,  $p=0.8713$ ). **c**, miR-OxR2 mice did not display any differences in anxiety-related behavior in the open field compared to miR-scrambled mice (two-tailed student's t-test,  $n=12$  biologically independent mice per group,  $t(22)=1.012$ ,  $p=0.3224$ ). All data are expressed as mean + SEM.
